# Supplementary material for: An enhanced electrochemical CO2 reduction reaction on the SnOx–PdO surface of SnPd nanoparticles decorated on N-doped carbon fibers
Source: Royal Society of Chemistry journal article supplement (doi:10.1039/d0cy01437k), 2020-10-28
Supplement: d0cy01437k1.pdf [file d0cy01437k1.pdf]

## Electronic Supplementary Information

### An Enhanced Electrochemical CO<sub>2</sub> Reduction Reaction on the SnO<sub>x</sub>-PdO surface of SnPd Nanoparticles Decorated on N-doped Carbon Fibers

Sreekanth Narayanaru<sup>a,b</sup>, Gopinathan M Anilkumar<sup>a,b,c</sup>, Masaki Ito<sup>c</sup>, Takanori Tamaki<sup>a,b</sup>, and Takeo Yamaguchi<sup>a,b\*</sup>

<sup>a</sup> Laboratory for Chemistry and Life Sciences,

Tokyo Institute of Technology, R1-17, 4259 Nagatsuta, Midori-Ku, Yokohama 226-850

<sup>b</sup> Core Research for Evolutionary Science and Technology, Japan Science and Technology Agency (JST-CREST), Japan 102-0076

<sup>c</sup> R&D Centre, Noritake Co., Ltd, 300 Higashiyama, Miyochi-cho, Miyoshi, Japan 470-0293

\*E-mail: [yamag@res.titech.ac.jp](mailto:yamag@res.titech.ac.jp)

#### S1. ICP Data

| Catalyst                              | Total amount of catalyst (including NCF) (mg) | Weight of the metal present in 10 mg of sample (mg) |      | Wt.% of Sn in total metal loading       | Wt.% of Pd in total metal loading       |
|---------------------------------------|-----------------------------------------------|-----------------------------------------------------|------|-----------------------------------------|-----------------------------------------|
|                                       |                                               | Sn                                                  | Pd   | $\left[\frac{Sn}{Sn + Pd}\right] * 100$ | $\left[\frac{Pd}{Sn + Pd}\right] * 100$ |
| Sn <sub>100</sub> -NCF                | 10                                            | 3.63                                                | 0    | 100                                     |                                         |
| Sn <sub>97</sub> Pd <sub>3</sub> -NCF | 10                                            | 2.67                                                | 0.08 | 97.01                                   | 2.99                                    |
| Sn <sub>95</sub> Pd <sub>5</sub> -NCF | 10                                            | 3.70                                                | 0.19 | 95.02                                   | 4.98                                    |
| Sn <sub>94</sub> Pd <sub>6</sub> -NCF | 10                                            | 3.75                                                | 0.22 | 94.33                                   | 5.67                                    |
| Sn <sub>91</sub> Pd <sub>9</sub> -NCF | 10                                            | 4.16                                                | 0.39 | 91.33                                   | 8.67                                    |

**Table S1.** The weight distribution of individual metals present in Sn<sub>100</sub>-NCF and Sn<sub>100-y</sub>Pd<sub>y</sub>-NCF

## S2. XPS Analysis

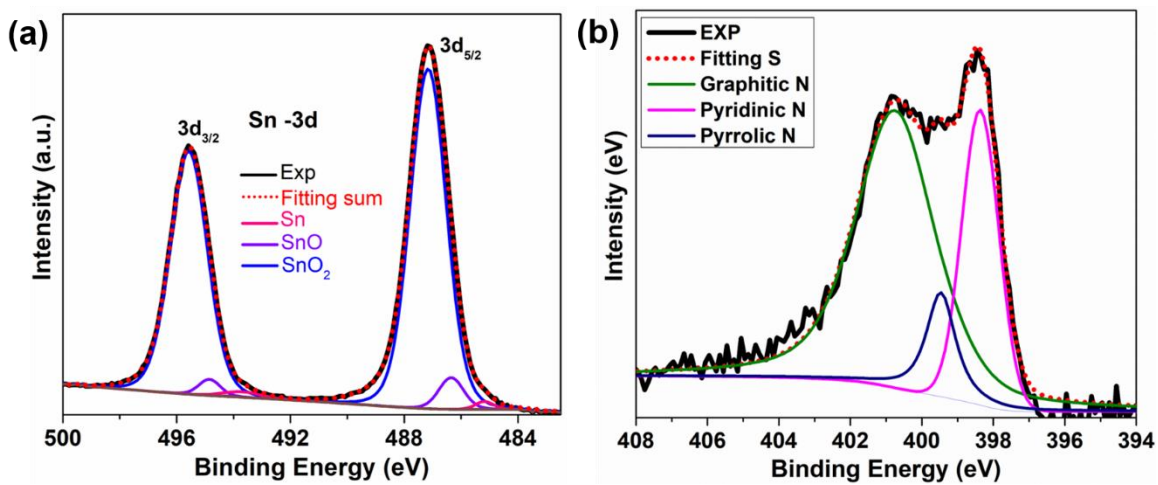

Figure S1. XPS spectra of Sn<sub>100</sub>-NCF. De-convoluted spectra of (a) Sn and (b) N.

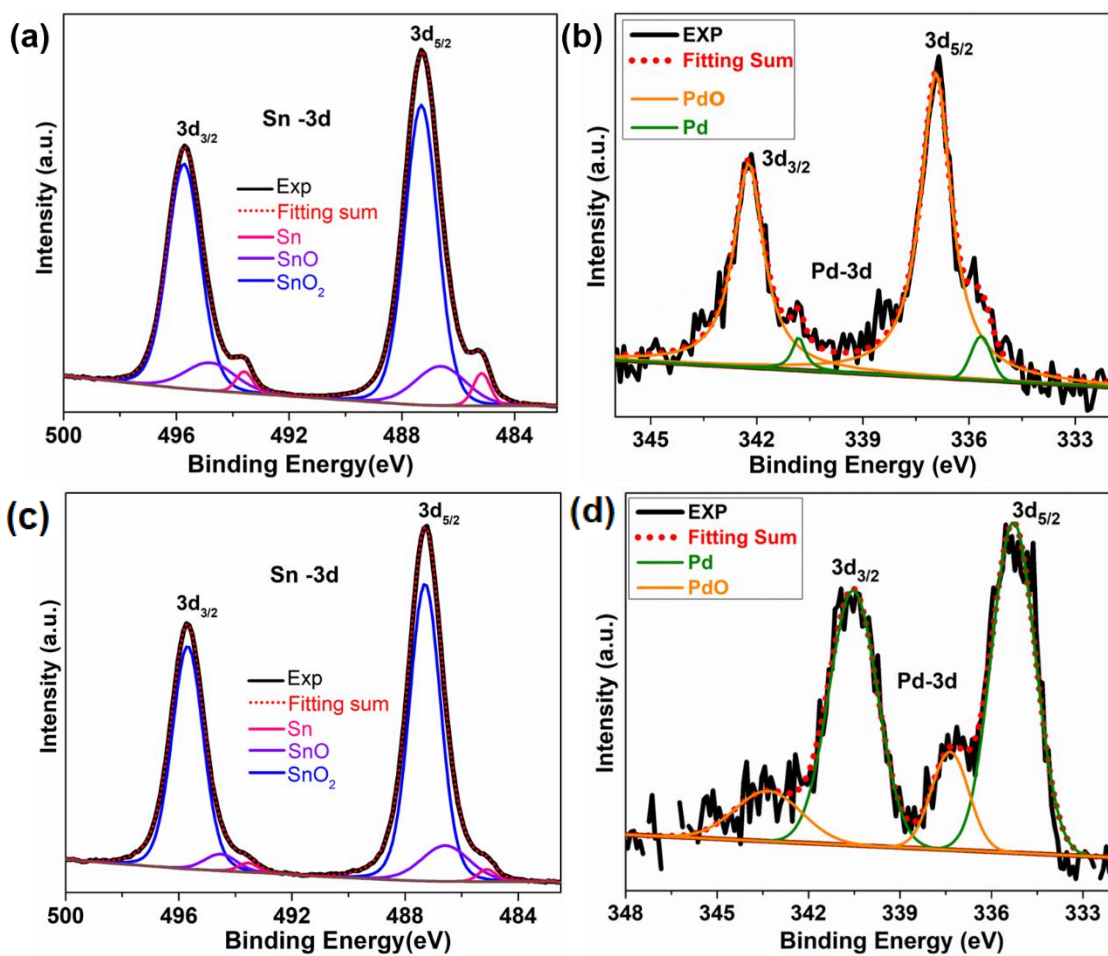

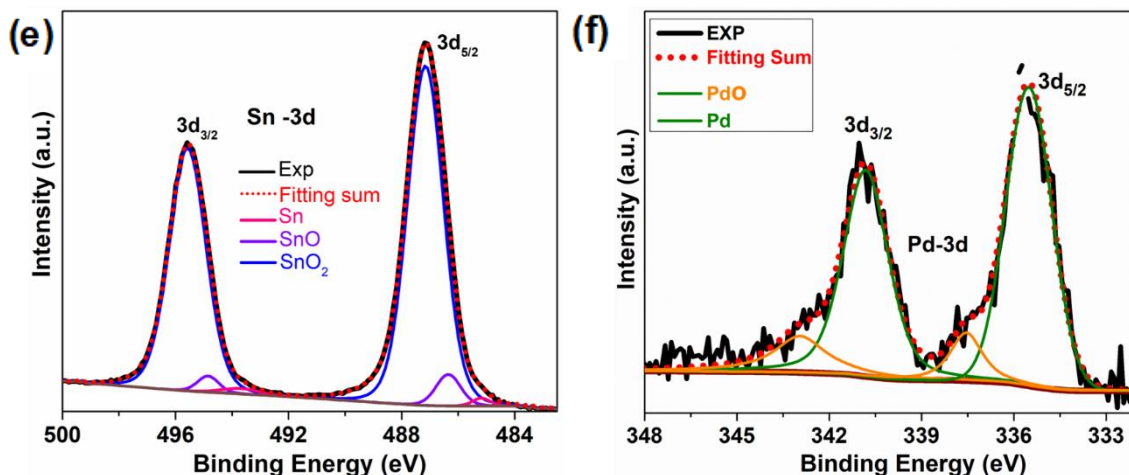

**Figure S2.** Deconvoluted XPS Sn and Pd spectra of (a) & (b) Sn<sub>95</sub>Pd<sub>5</sub>-NCF, (c) & (d) Sn<sub>94</sub>Pd<sub>6</sub>-NCF and (e) & (f) Sn<sub>91</sub>Pd<sub>9</sub>-NCF.

### S2.1 Calculation of the atomic percentage from XPS data

The atomic percentage of each oxidation state of Sn and Pd present in a catalyst was calculated from its corresponding deconvoluted XPS spectrum. The percentages of different oxidation states of Sn were calculated by measuring the peak area of Sn, SnO and SnO<sub>2</sub> in the deconvoluted Sn -3d<sub>5/2</sub> peak, and then the area of a particular oxidation state was divided by the total area of the peak and then multiplied by 100 to obtain the percentage.

The area under the curve of Sn, SnO<sup>2+</sup>, and SnO<sub>2</sub> in the Sn -3d<sub>5/2</sub> peak is defined as A<sub>Sn</sub>, A<sub>SnO</sub>, and A<sub>SnO<sub>2</sub></sub>, respectively.

The total area of the Sn -3d<sub>5/2</sub> peak was calculated as  $A_{\text{Sn}-3d_{5/2}} = A_{\text{Sn}} + A_{\text{SnO}} + A_{\text{SnO}_2}$ .

The percentage of Sn in the Sn -3d<sub>5/2</sub> peak was calculated as  $\% \text{ Sn} = (A_{\text{SnO}}/A_{\text{Sn}-3d_{5/2}}) \times 100$ .

Similarly, we calculated the atomic percentage of the different oxidation states of Pd, *i.e.*, Pd and PdO, from the deconvoluted Pd-3d<sub>5/2</sub> peak.

(a)

| Catalyst                              | Sn (3d <sub>5/2</sub> ) |           |          | SnO (3d <sub>5/2</sub> ) |           |          | SnO <sub>2</sub> (3d <sub>5/2</sub> ) |           |          |
|---------------------------------------|-------------------------|-----------|----------|--------------------------|-----------|----------|---------------------------------------|-----------|----------|
|                                       | Position (eV)           | Peak Area | Atomic % | Position (eV)            | Peak Area | Atomic % | Position                              | Peak Area | Atomic % |
| Sn <sub>100</sub> -NCF                | 485.17                  | 121.8     | 1.07     | 486.28                   | 674.2     | 5.93     | 487.25                                | 10556.4   | 93.0     |
| Sn <sub>97</sub> Pd <sub>3</sub> -NCF | 485.18                  | 810.6     | 3.26     | 486.28                   | 3263.2    | 13.14    | 487.31                                | 20744.9   | 83.60    |
| Sn <sub>95</sub> Pd <sub>5</sub> -NCF | 485.17                  | 376.2     | 1.88     | 486.26                   | 1053.5    | 5.26     | 487.30                                | 18593.1   | 92.86    |
| Sn <sub>94</sub> Pd <sub>6</sub> -NCF | 485.15                  | 229.3     | 1.93     | 486.32                   | 1821.0    | 15.44    | 487.29                                | 9749.3    | 82.63    |
| Sn <sub>91</sub> Pd <sub>9</sub> -NCF | 485.19                  | 635.6     | 2.75     | 486.23                   | 1033.7    | 4.46     | 487.26                                | 21478.4   | 92.79    |

(b)

| Catalyst                              | Pd (3d <sub>5/2</sub> ) |           |          | PdO (3d <sub>5/2</sub> ) |           |          |
|---------------------------------------|-------------------------|-----------|----------|--------------------------|-----------|----------|
|                                       | Position (eV)           | Peak Area | Atomic % | Position (eV)            | Peak Area | Atomic % |
| Sn <sub>97</sub> Pd <sub>3</sub> -NCF |                         |           |          | 336.9                    | 230.8     | 100      |
| Sn <sub>95</sub> Pd <sub>5</sub> -NCF | 335.5                   | 20.6      | 5.86     | 336.9                    | 330.8     | 94.14    |
| Sn <sub>94</sub> Pd <sub>6</sub> -NCF | 336.2                   | 342.3     | 80.80    | 337.3                    | 81.3      | 19.20    |
| Sn <sub>91</sub> Pd <sub>9</sub> -NCF | 336.4                   | 566.4     | 91.59    | 337.5                    | 52.0      | 8.41     |

**Table S2.** XPS peak position, peak area, and atomic percentage of (a) Sn, SnO, SnO<sub>2</sub>, (b) Pd and PdO in various SnPd-NCF catalysts.

### S3. EDS Analysis of the Elemental Composition of SnPd–NCFs

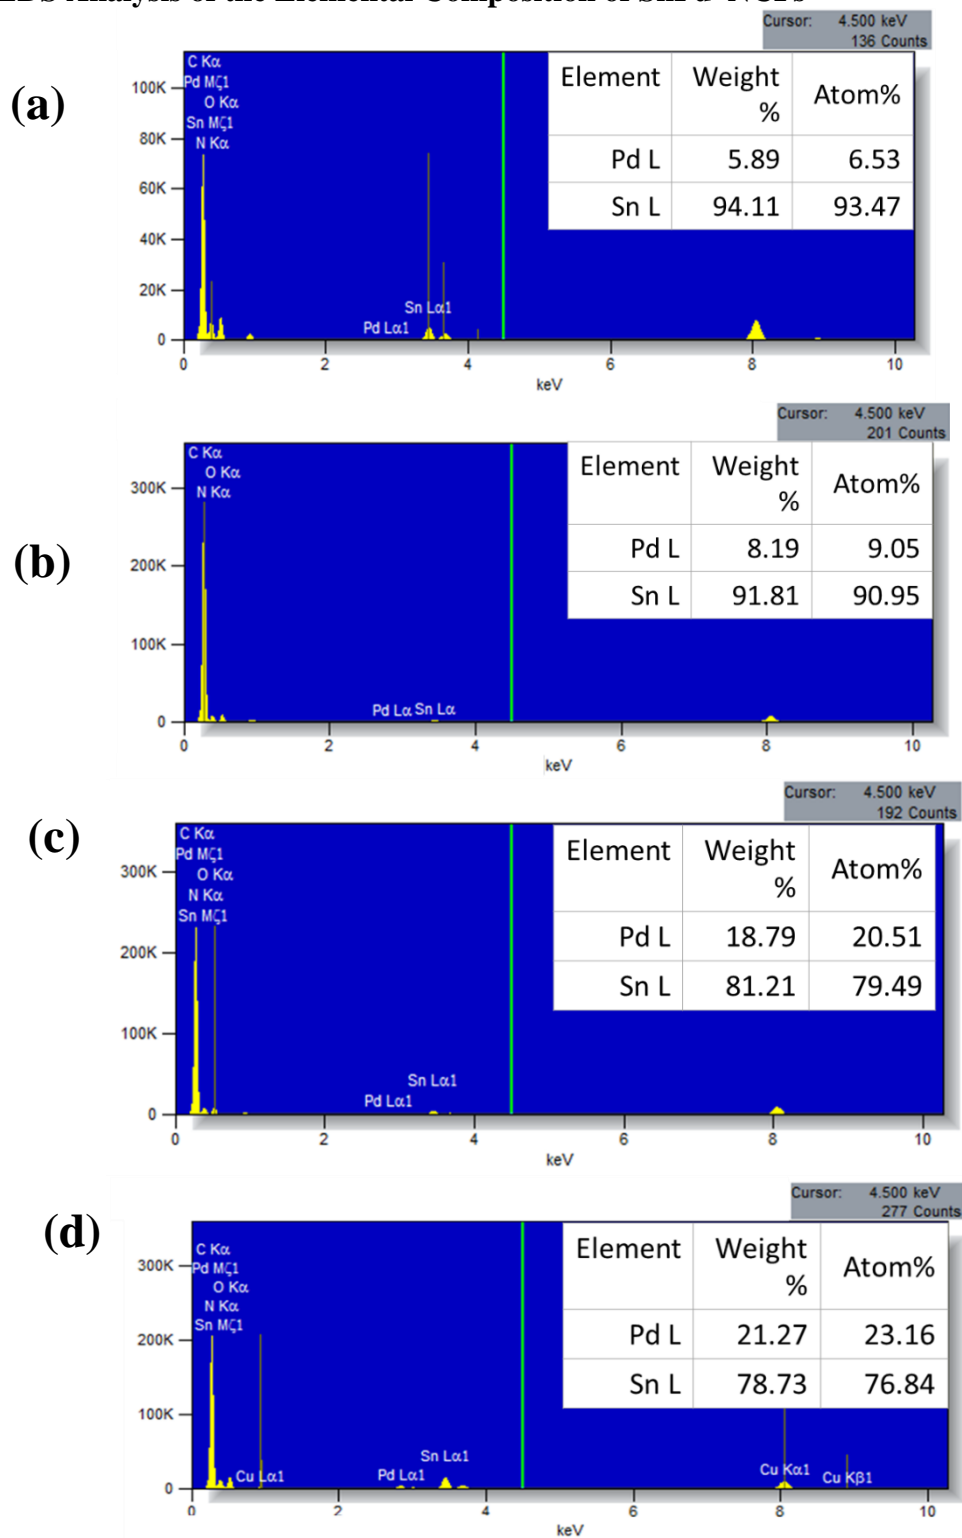

**Figure S3.** EDS spectra of (a) Sn<sub>97</sub>Pd<sub>3</sub>-NCF, (b) Sn<sub>95</sub>Pd<sub>5</sub>-NCF, (c) Sn<sub>94</sub>Pd<sub>6</sub>-NCF, and (d) Sn<sub>91</sub>Pd<sub>9</sub>-NCF.

#### S4. Ag/AgCl reference electrode calibration and conversion to RHE

We performed LSV in H<sub>2</sub>-saturated electrolytes of 0.5 M H<sub>2</sub>SO<sub>4</sub>, pH 8.3 (equivalent pH of 0.5 M KHCO<sub>3</sub>) and pH 7.2 (equivalent pH of CO<sub>2</sub>-saturated 0.5 M KHCO<sub>3</sub>), using a Pt wire as the working electrode and counter electrode at a scan rate of 1 mV/s to convert the E<sub>Ag/AgCl</sub> to E<sub>RHE</sub> (Figure S4). The potential at which zero current was obtained was the thermodynamic potential equivalent RHE at that pH. The potential at which zero current was obtained was pH 0 = 0.208 V (considered as E<sub>Ag/AgCl</sub>), pH 7.2 = 0.634 V, and pH 8.3 = 0.701 V. The reported current density values were normalized to the geometric area of the electrode.

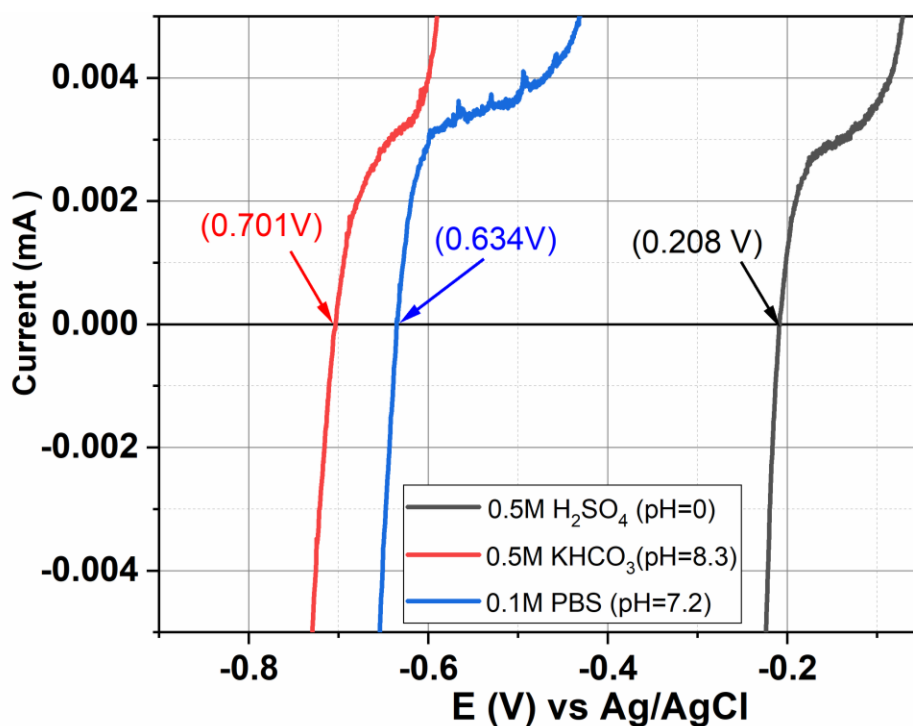

**Figure S4.** Linear sweep voltammograms performed using Pt as the working and counter electrodes and Ag/AgCl as a reference electrode in hydrogen-saturated 0.5 M H<sub>2</sub>SO<sub>4</sub>, 0.5 M KHCO<sub>3</sub>, and 0.1 M PBS at pH 7.2.

## S5. Linear sweep voltammetry in N<sub>2</sub>- and CO<sub>2</sub>-saturated 0.5 M KHCO<sub>3</sub> solutions

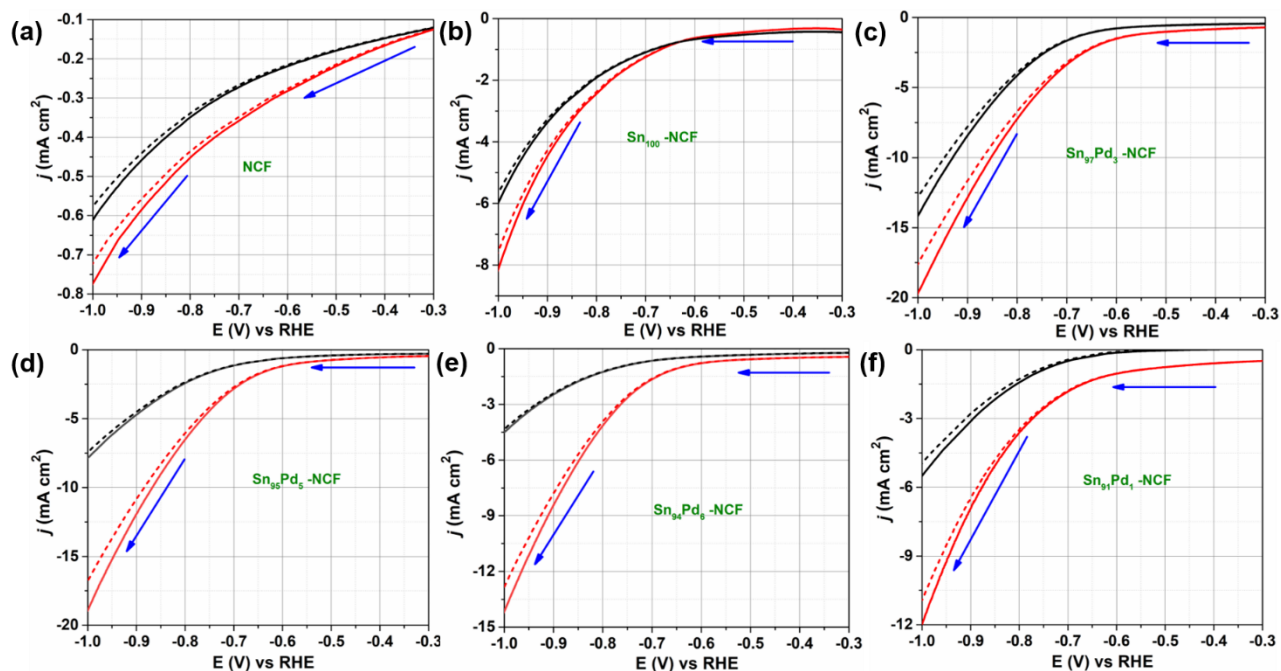

**Figure S5.** Linear sweep voltammograms of (a) NCF, (b) Sn<sub>100</sub>-NCF, (c) Sn<sub>97</sub>Pd<sub>3</sub>-NCF, (d) Sn<sub>95</sub>Pd<sub>5</sub>-NCF, (e) Sn<sub>94</sub>Pd<sub>6</sub>-NCF, and (f) Sn<sub>91</sub>Pd<sub>9</sub>-NCF measured in N<sub>2</sub>- and CO<sub>2</sub>-saturated 0.5 M KHCO<sub>3</sub> solutions before (dotted lines) and after (solid lines) iR correction.

## S6. Product Analysis and Faradaic efficiency.

### S6.1 NMR spectra and formate calibration

An aliquot (0.5 mL) of catholyte was collected after electrolysis and mixed with 0.1 mL of D<sub>2</sub>O and 0.1 mL DMSO (3.5 mM). The <sup>1</sup>H spectrum of the mixture was measured with water suppression and a presaturation method using a Bruker 400 MHz NMR spectrometer. The amount of formate produced was calculated by comparing the integral areas of the formate peak with the DMSO peak [1]. The NMR instrument was calibrated by plotting a calibration curve (Figure S6) using standard solutions of formate prepared from potassium formate (Wako Chemicals)

The Faradaic efficiency was calculated using the following equation:

$$\text{Faradaic Efficiency for formate} = \frac{n 2 F}{q} \times 100 \quad (1)$$

where n is the number of moles of formate produced calculated from the NMR spectrum, F is the Faraday constant and q is the number of coulombs transferred.

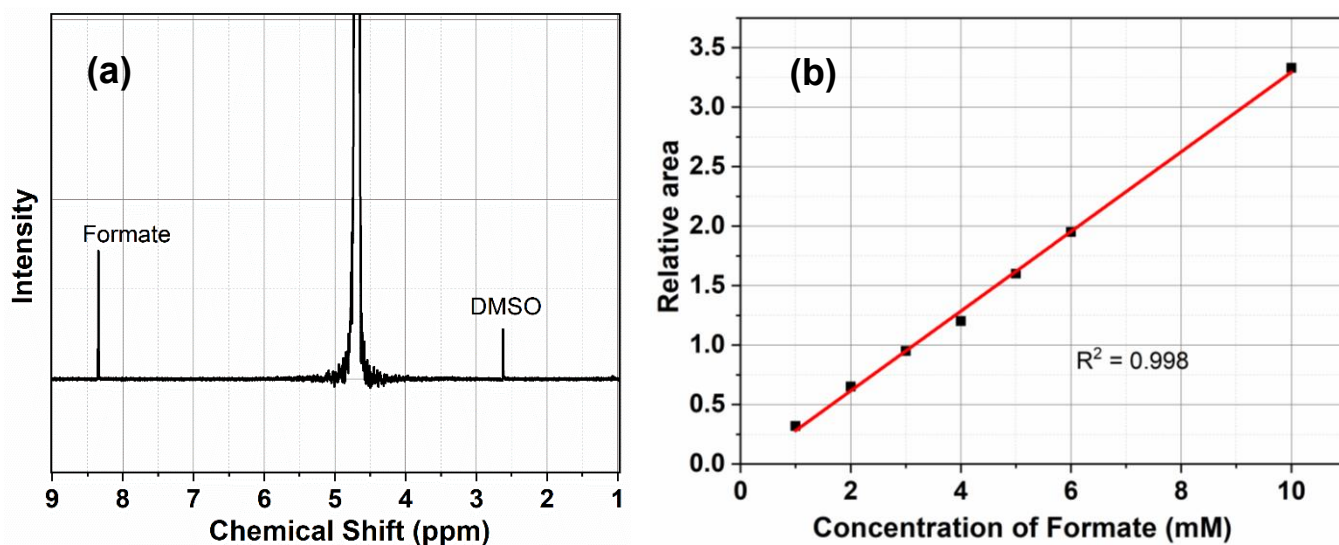

**Figure S6.** (a) <sup>1</sup>H NMR spectra of a 0.5 M KHCO<sub>3</sub> electrolyte containing the CO<sub>2</sub> reduction reaction product formate and internal standard DMSO, and (b) NMR calibration curve obtained by plotting the linear relationship between the formate concentration and relative area vs DMSO.

## S6.2 Gas Chromatography

Gas products were quantified using a gas chromatograph (Shimadzu GC-2010 Tracera) equipped with Micropacked ST in series with a Shincarbon ST column and Barrier Discharge Ionization Detector (BID). Ultrahigh purity helium was used as the carrier gas. The gas products of CO<sub>2</sub>RR along with the flowed CO<sub>2</sub> gas at a flow rate of 100 mL/min were measured from the cathodic compartment by directly venting them into the gas chromatograph. The Faradaic efficiency of the gas products was calculated using the following equation [2]:

$$\text{Faradaic Efficiency of } \frac{CO}{H_2} = \frac{\text{peak area} \times \text{flow rate} \times 2Fp_0 \times (\text{electrode area})^{-1}}{\alpha \times RT \times j} \times 100 \quad (2)$$

where  $\alpha$  is a conversion factor based on the calibration of the gas chromatograph with standard samples (which is 72.3 for H<sub>2</sub> and 992.6 for CO),  $p_0 = 1.013$  bar,  $F$  is the Faraday constant,  $R$  is the gas constant,  $T = 298$  K and  $j$  is the total current density.



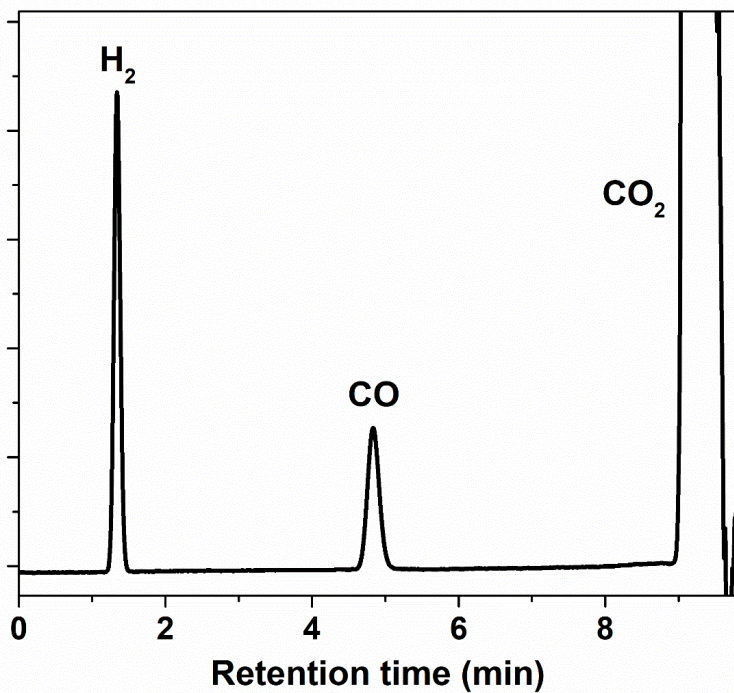

**Figure S7.** Representative GC spectrum of the CO<sub>2</sub> reduction reaction product.

### S6.3 Faradaic efficiencies of NCF

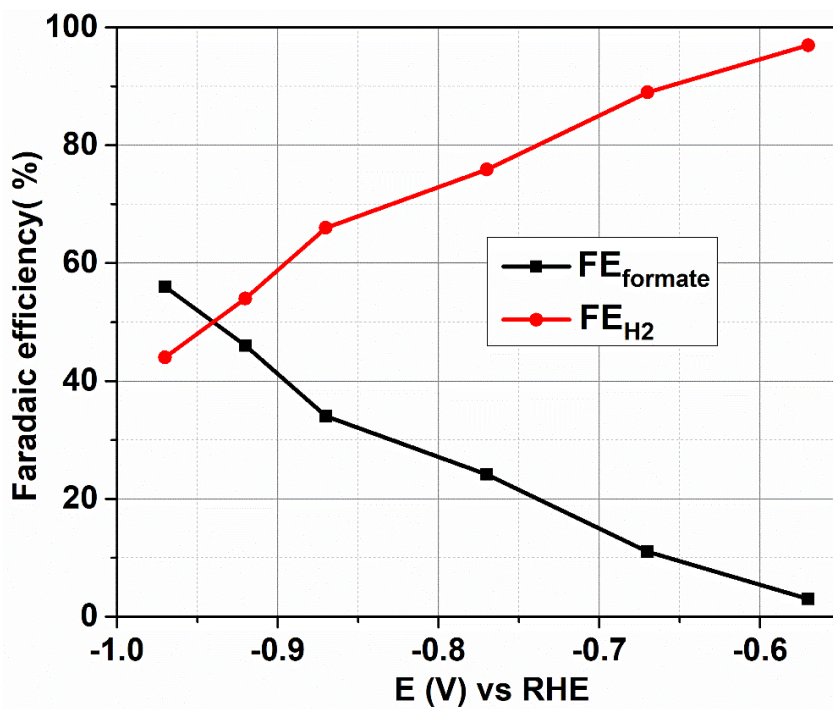

**Figure S8.** Formate and hydrogen faradaic efficiency of N-doped carbon fibers

### S7. Partial current density and FE<sub>H2</sub>

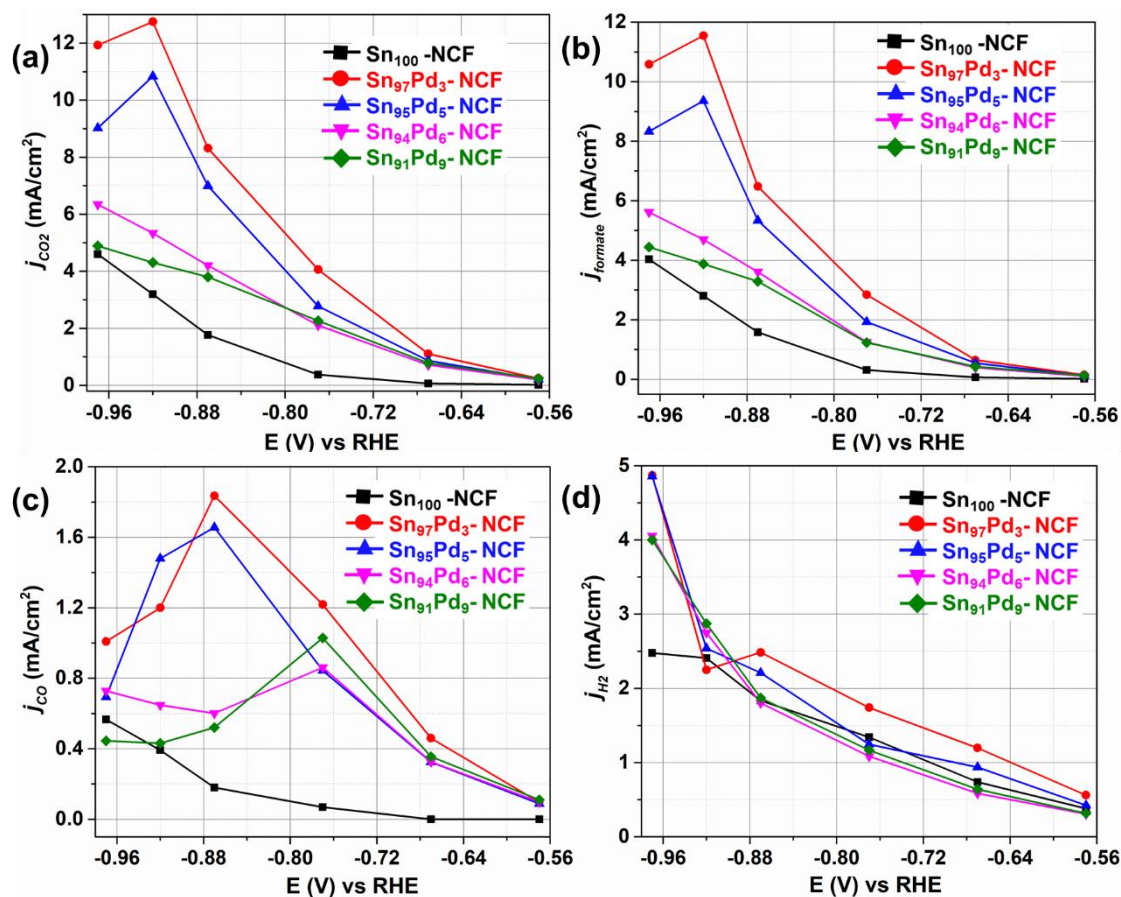

Figure S9. (a)  $j_{\text{CO}_2}$ , (b)  $j_{\text{formate}}$ , (c)  $j_{\text{CO}}$  and (d)  $j_{\text{H}_2}$  of  $\text{Sn}_{100}$ -NCF and  $\text{Sn}_{100-y}\text{Pd}_y$ -NCF

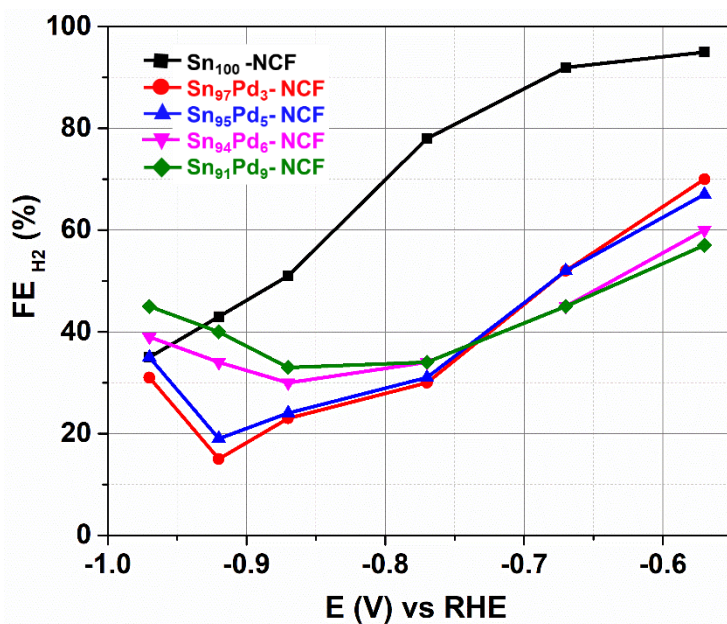

Figure S10. Hydrogen faradaic efficiency of  $\text{Sn}_{100}$ -NCF and  $\text{Sn}_{100-y}\text{Pd}_y$ -NCF.

## S8. Electrochemical CO<sub>2</sub> reduction on PdO

The electrochemical CO<sub>2</sub> reduction activity of PdO was tested in a 0.5 M KHCO<sub>3</sub> solution saturated with CO<sub>2</sub>. 1 cm<sup>2</sup> and 0.5 mm thick oxidized Pd sheet was used as the electrode. Pd was oxidized by thermal treatment as reported elsewhere [3]. Constant potential electrolysis was performed by applying – 0.37 V for 30 minutes under a constant flow of CO<sub>2</sub>. An aliquot of electrolyte was collected every 10 minutes and NMR analysis was performed for calculating the formate faradaic efficiency. XRD analysis of PdO was performed before, in between, and after electrolysis.

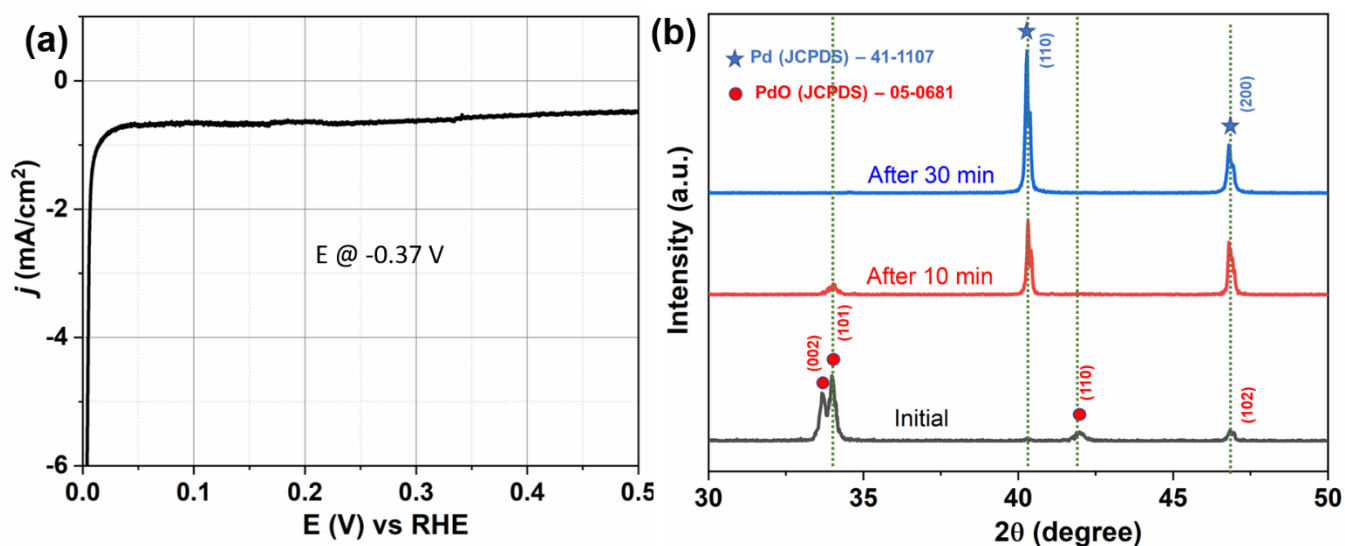

**Figure S11.** (a) Constant potential electrolysis of CO<sub>2</sub> at – 0.37 V and (a) XRD patterns of PdO at different stages of electrolysis.

S9. Stability assessment: Constant potential CO<sub>2</sub> electrolysis.

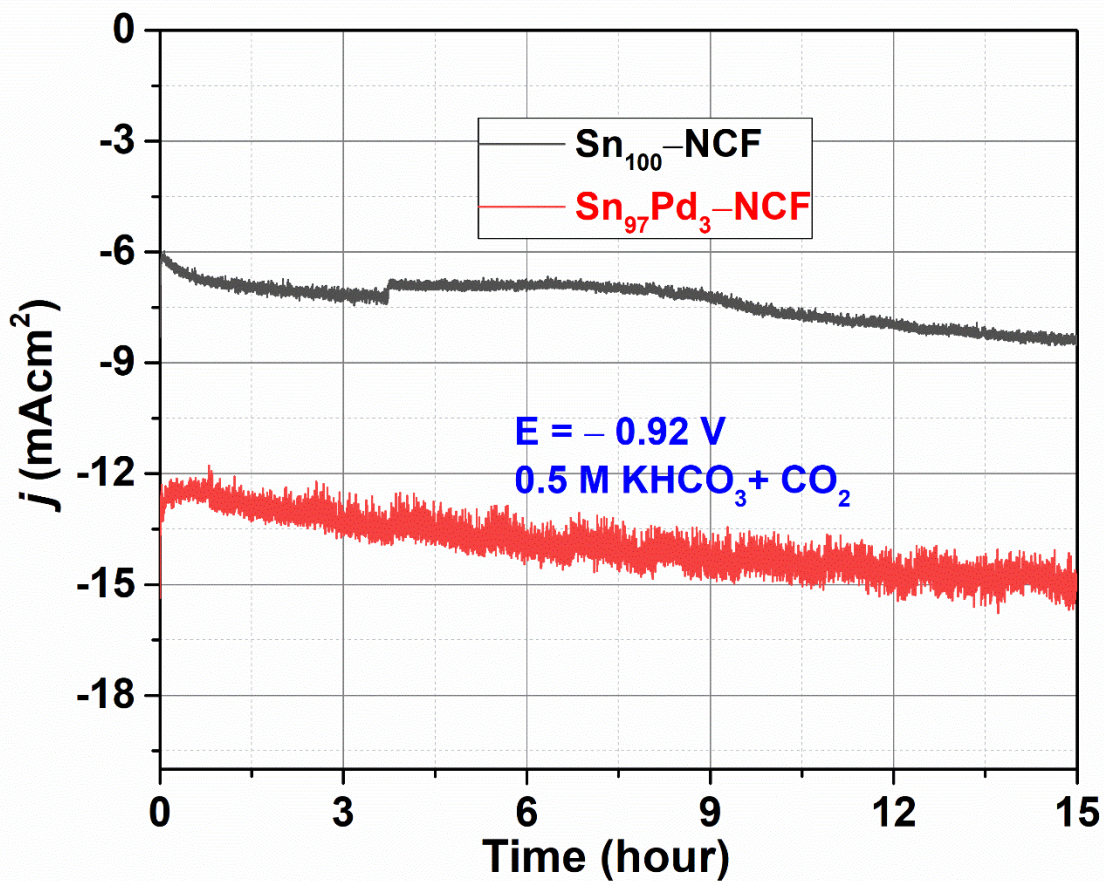

**Figure S12.** Constant potential electrolysis for CO<sub>2</sub> reduction on Sn<sub>100</sub>-NCF and Sn<sub>97</sub>Pd<sub>3</sub>-NCF at -0.92 V compared with the RHE in 0.5 M KHCO<sub>3</sub> saturated with CO<sub>2</sub>.

## S10. Material characterization of Sn<sub>97</sub>Pd<sub>3</sub>-NCF after Electrolysis

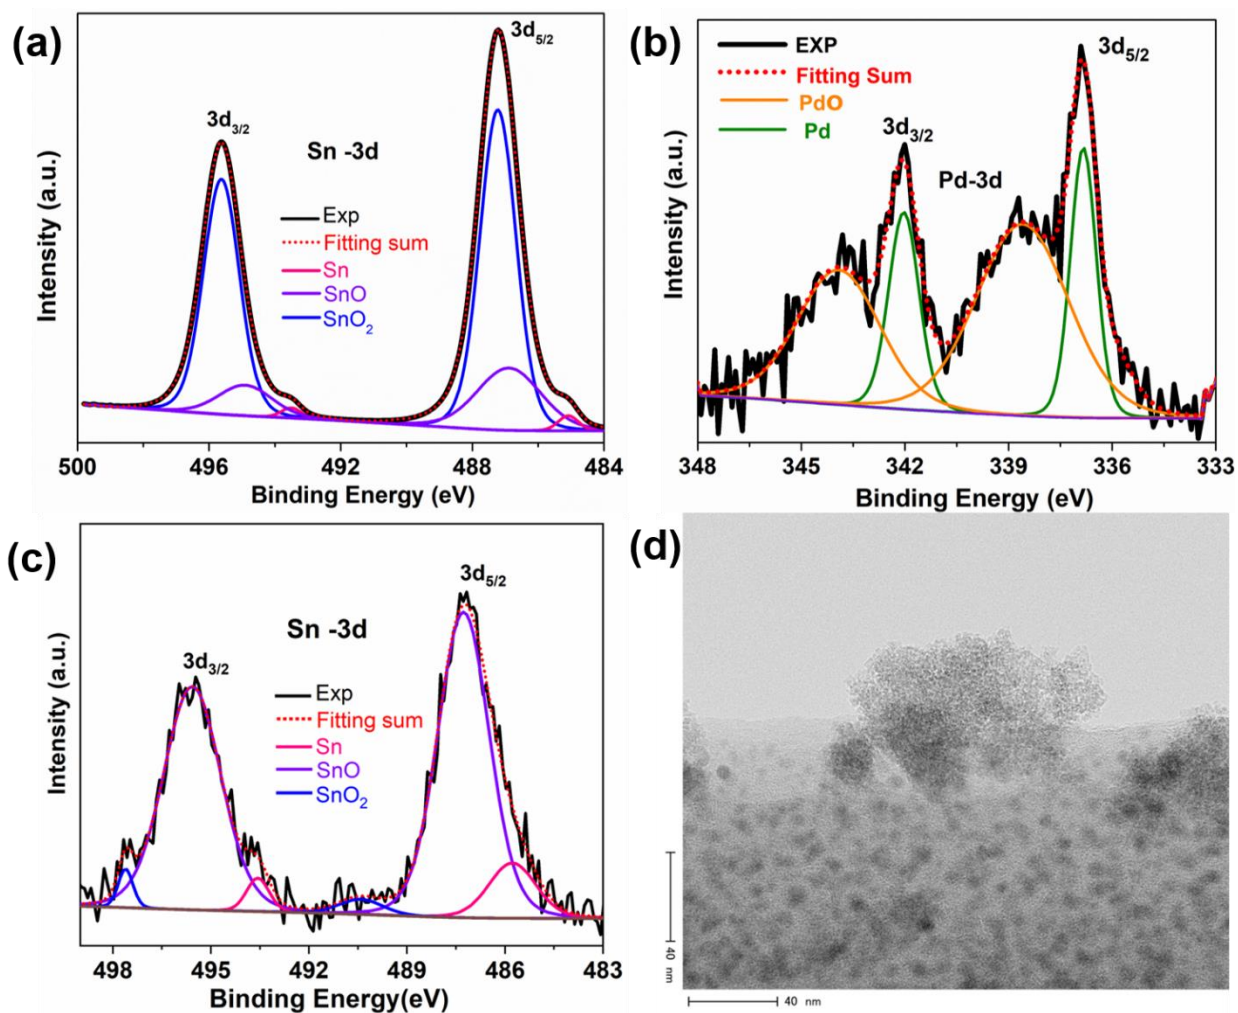

**Figure S13.** Deconvoluted XPS spectra of (a) Sn-3d and (b) Pd-3d after 9 hours of electrolysis, (c) Sn-3d after 15 hours of electrolysis, and (d) HR-TEM images of the Sn<sub>97</sub>Pd<sub>3</sub>-NCF catalyst after 15 hours electrolysis (scale bar 40 nm).

## S11. Impedance Spectroscopy Analysis

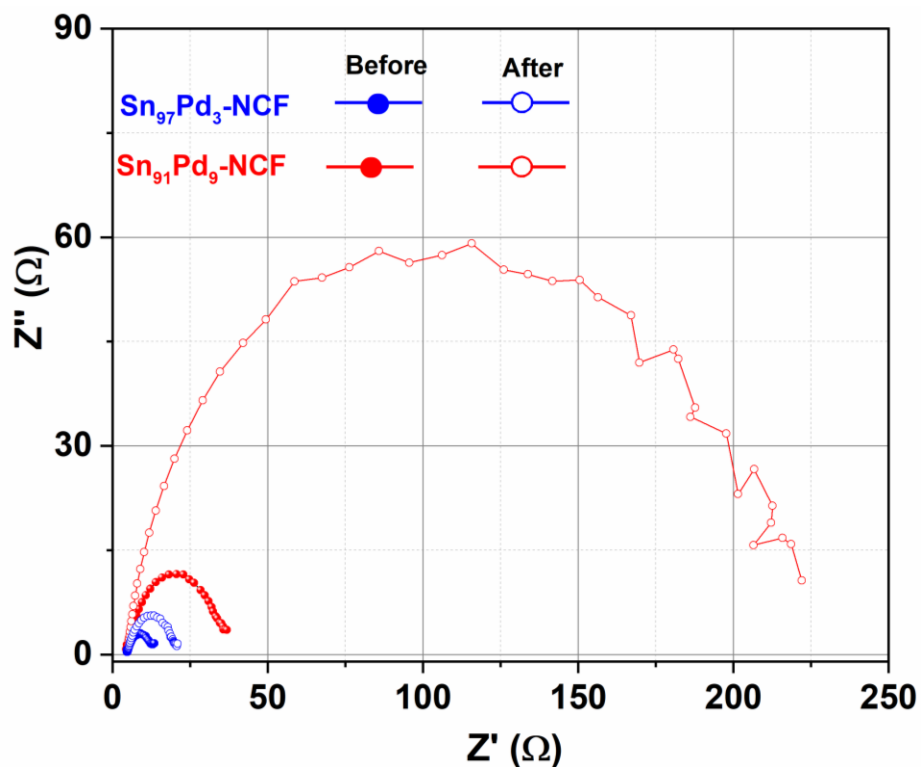

**Figure S14.** Nyquist plots of Sn<sub>97</sub>Pd<sub>3</sub>-NCF and Sn<sub>91</sub>Pd<sub>9</sub>-NCF measured at  $-0.87$  V before and after CO<sub>2</sub> electrolysis.

| Catalyst                              | RCT values ( $\Omega$ ) |              |
|---------------------------------------|-------------------------|--------------|
|                                       | At $-0.37$ V            | At $-0.87$ V |
| Sn <sub>91</sub> Pd <sub>9</sub> -NCF | 33                      | 30           |
| Sn <sub>94</sub> Pd <sub>6</sub> -NCF | 35                      | 24           |
| Sn <sub>95</sub> Pd <sub>5</sub> -NCF | 43                      | 16           |
| Sn <sub>97</sub> Pd <sub>3</sub> -NCF | 47                      | 7            |
| Sn <sub>100</sub> -NCF                | 100                     | 81           |

**Table S3.** R<sub>CT</sub> values of Sn<sub>100</sub>-NCF and SnPd-NCF catalysts were measured in a CO<sub>2</sub>-saturated 0.5 M KHCO<sub>3</sub> solution at  $-0.37$  V and  $-0.87$  V.

## S12. Tafel plot of the Sn<sub>100</sub>-NCF Catalyst

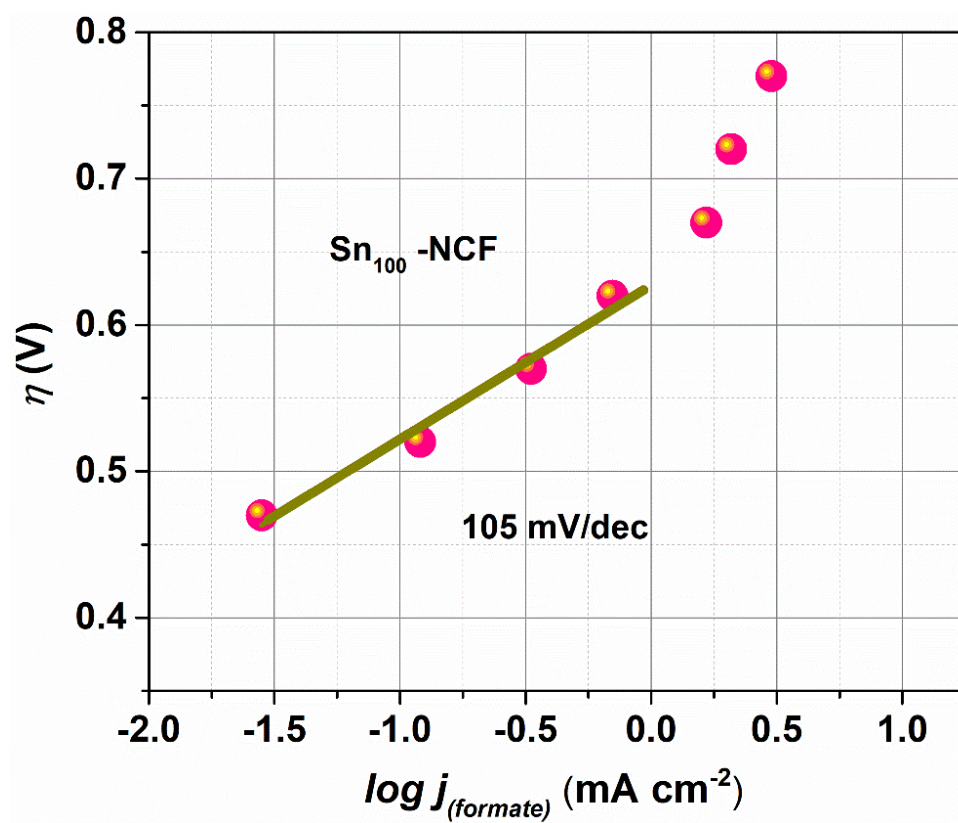

Figure S15. Tafel plot of Sn<sub>100</sub>-NCF.

S13. Bicarbonate reduction on Sn<sub>100-y</sub>Pd<sub>y</sub>-NCF catalysts.

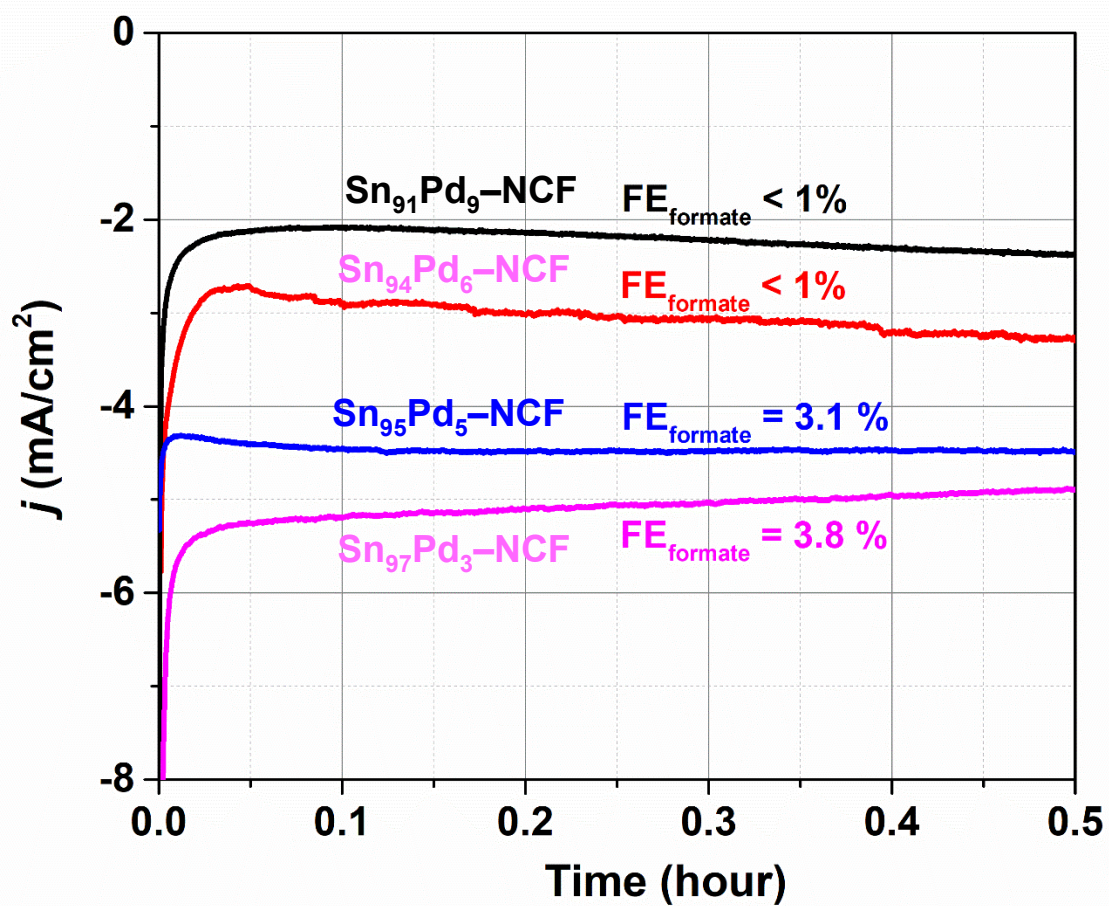

**Figure S16.** Constant potential electrolysis for bicarbonate reduction on Sn<sub>100-y</sub>Pd<sub>y</sub>-NCF in 0.5 M KHCO<sub>3</sub> saturated with N<sub>2</sub>.



### S14. Bicarbonate reduction reaction on Pd and PdO surface.

Electrochemical bicarbonate reduction activity of Pd and PdO was tested in a 0.5 M KHCO<sub>3</sub> solution saturated with N<sub>2</sub>. 1 cm<sup>2</sup> and 0.5 mm thick Pd and oxidized Pd sheet was used as the electrode.. Bicarbonate electrolysis was performed by applying a constant potential of -0.50 V for one hour under a constant flow of N<sub>2</sub>.

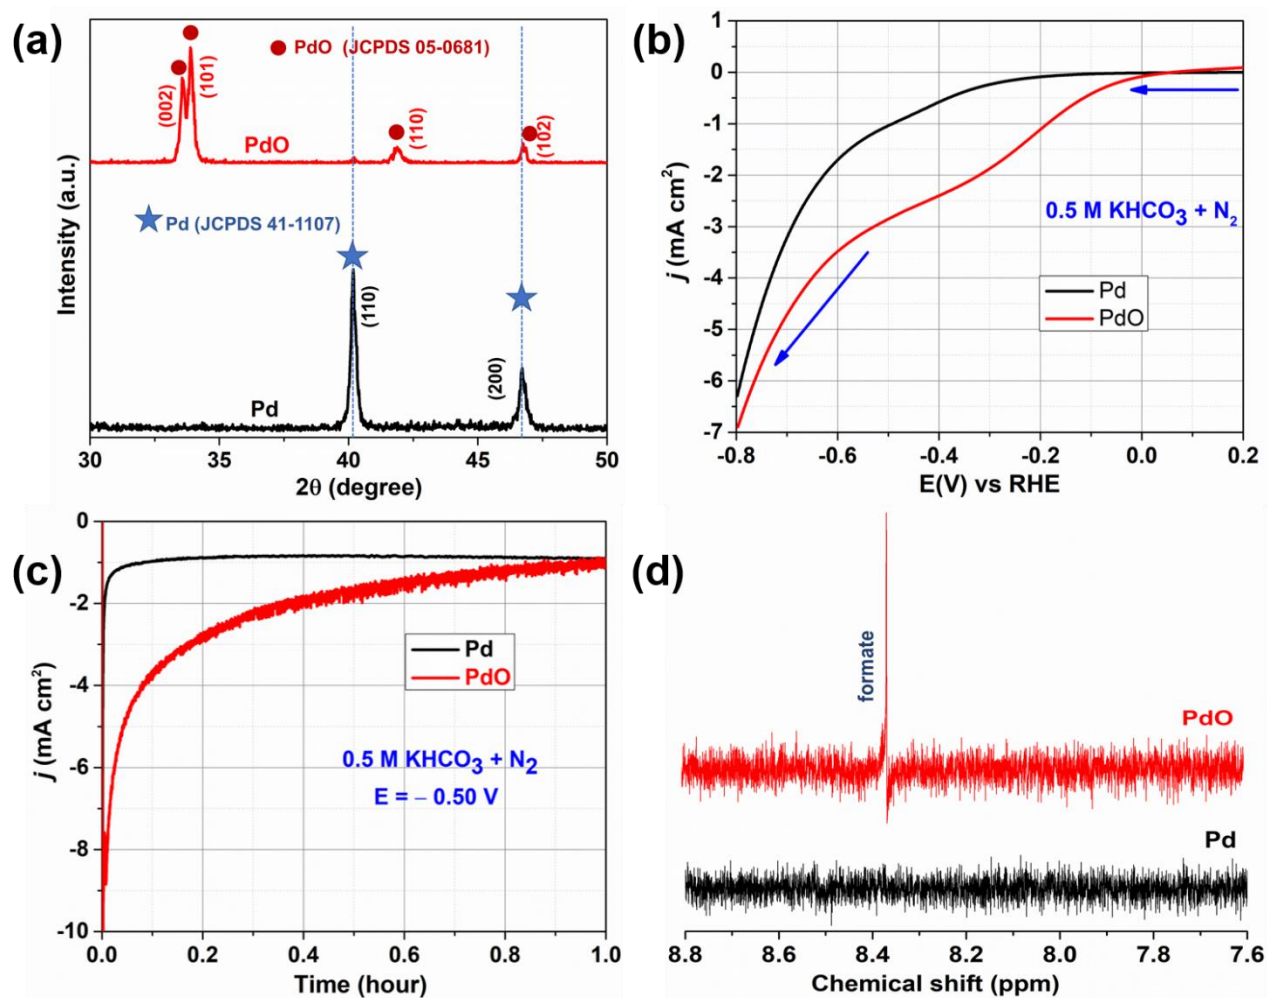

**Figure S17.** Material characterization and electrochemical bicarbonate reduction activity of Pd and PdO (a) XRD patterns (b) Linear sweep voltammogram measured in N<sub>2</sub> saturated 0.5 M KHCO<sub>3</sub> at a scan rate of 10 mV/s (c) Constant potential electrolysis at -0.50 V, and (d) <sup>1</sup>H NMR spectra of bicarbonate electrolyte after electrochemical reduction reaction.

**S15. Comparison of the catalytic activity of Sn<sub>97</sub>Pd<sub>3</sub>-NCF with other benchmarked Sn-based electrocatalysts.**

**Table S4.** Comparison of the electrocatalytic CO<sub>2</sub>RR activities of different Sn-based catalysts for formate production.

| Catalyst                                 | Catalyst (metal) Loading (mg/cm <sup>2</sup> ) | Electrolyte                   | Applied Potential (V vs RHE) | Faradaic Efficiency % | Partial current density (mA cm <sup>-2</sup> ) | References        |
|------------------------------------------|------------------------------------------------|-------------------------------|------------------------------|-----------------------|------------------------------------------------|-------------------|
| <b>Sn<sub>97</sub>Pd<sub>3</sub>-NCF</b> | <b>0.05</b>                                    | <b>0.5 M KHCO<sub>3</sub></b> | <b>-0.92</b>                 | <b>77</b>             | <b>11.5</b>                                    | <b>This study</b> |
| Sn-modified N-doped carbon fibers        | 0.97                                           | 0.5 M KHCO <sub>3</sub>       | -0.8                         | 62                    | 11.0                                           | 4                 |
| Sn/GDE                                   | 5.0                                            | 0.5 M KHCO <sub>3</sub>       | -1.17                        | 72.9                  | 9.8                                            | 5                 |
| PdSn/C                                   | 0.5                                            | 0.5 M KHCO <sub>3</sub>       | -0.46                        | 100                   | 2.0                                            | 6                 |
| Sn/GDE                                   | 3.0                                            | 0.5 M NaHCO <sub>3</sub>      | -1.1                         | 71                    | 5.8                                            | 7                 |
| Sn/GDE                                   | 0.7                                            | 0.5 M NaHCO <sub>3</sub>      | -1.17                        | 70                    | 18.9                                           | 8                 |
| Porous SnO <sub>2</sub> /carbon cloth    | 1.02                                           | 0.5 M NaHCO <sub>3</sub>      | -0.92                        | 89                    | 43.0                                           | 9                 |
| Sn-pNWs                                  | 4.0                                            | 0.1 M KHCO <sub>3</sub>       | -0.8                         | 80                    | 4.8                                            | 10                |
| m-SnO <sub>2</sub>                       | 1.0                                            | 0.1 M KHCO <sub>3</sub>       | -1.15                        | 75                    | 8.2                                            | 11                |
| Sn/GDE                                   | 2.0                                            | 0.1 M KHCO <sub>3</sub>       | -1.2                         | 64.1                  | 2                                              | 12                |
| SnO <sub>2</sub> /graphene               | 0.21                                           | 0.1 M NaHCO <sub>3</sub>      | -1.17                        | 93.6                  | 9.5                                            | 13                |
| Mn-doped SnO <sub>2</sub>                | 1                                              | 0.1M KHCO <sub>3</sub>        | -1.03                        | 85                    | 21.2                                           | 14                |
| Thin-layered SnSe <sub>2</sub>           | -                                              | 0.1 M KHCO <sub>3</sub>       | -0.8                         | 91 ± 4                | 15.2                                           | 15                |
| Nanorod@sheet SnO                        | 1                                              | 1 M KOH                       | -0.7                         | 94                    | -330                                           | 16                |

## References

1. K. P. Kuhl, E. R. Cave, D. N. Abram, and T. F. Jaramillo, *Energy Environ. Sci.*, 2012, 5, 7050–7059.
2. Y. Chen, C. W. Li, and M. W. Kanan, *J. Am. Chem. Soc.*, 2012, 134, 19969–19972.
3. W. T. Grubb and L. H. King, *Anal. Chem.*, 1980, 52, 270-273.
4. Y. Zhao, J. Liang, C. Wang, J. Ma, and G. G. Wallace, *Adv. Energy Mater.*, 2018, 8, 1–9.
5. Q. Wang, H. Dong and H. Yu, *RSC Adv.*, 2014, 4, 59970–59976.
6. X. Bai, W. Chen, C. Zhao, S. Li, Y. Song, R. Ge, W. Wei and Y. Sun, *Angew. Chemie - Int. Ed.*, 2017, 56, 12219–12223.
7. E. Irtem, T. Andreu, A. Parra, M. D. Hernández-Alonso, S. García-Rodríguez, J. M. Riesco-García, G. Penelas-Pérez and J. R. Morante, *J. Mater. Chem. A*, 2016, 4, 13582.
8. G. K. S Prakash, F. A. Viva, and G. A. Olah, *J. Power Sources* 2013, 223,68.
9. F. Li, L. Chen, G. P. Knowles, D. R. MacFarlane, and J. Zhang, *Angew. Chemie - Int. Ed.*, 2017, 56, 505–509.
10. B. Kumar, V. Atla, J. P. Brian, S. Kumari, T. Q. Nguyen, M. Sunkara, and J. M. Spurgeon, *Angew. Chemie - Int. Ed.*, 2017, 56, 3645–3649.
11. R. Daiyan, X. Lu, W. H. Saputera, Y. H. Ng and R. Amal, *ACS Sustain. Chem. Eng.*, 2018, 6, 1670–1679.
12. S. Zhang, P. Kang, and T. J. Meyer, *J. Am. Chem. Soc.*, 2014, 136, 1734–1737.
13. J. Wu, F. G. Risalvato, S. Ma, and X. D. Zhou, *J. Mater. Chem. A*, 2014, 2, 1647–1651.
14. Y. Wei, J. Liu, F. Cheng and Jun Chen, *J. Mater. Chem. A*, 2019, 7, 19651–19656
15. H. Yang, H. Liu, X. Liu, Z. Zhao and J. Luo, *Catal. Sci. Technol.*, 2018, 8, 5428-5433
16. Y. Qian, Y. Liu, H. Tang, B. Lin, *J. CO2 Util.*, 2020, 42,101287
